## EDITORIAL

# JCS Editor changes

**Michael Way (Editor-in-Chief) and Sharon A. Ahmad (Executive Editor)**

*Journal of Cell Science* is very sorry to say goodbye to Francis Barr, who has stepped down as an Editor after 10 years. Francis covered membrane trafficking, mitosis, cytokinesis and cell signalling for the journal, handling over 1600 papers during his tenure. He has been a tremendous asset to JCS, and we are very pleased that he has agreed to remain a member of our Advisory Board and will continue to support JCS in that role.

We are fortunate to also have the pleasure of announcing the appointment of two new Editors on JCS: Daniel Billadeau and David Stephens.

Daniel Billadeau received his B.S. in genetics and cell biology from the University of Minnesota (Saint Paul). He remained at the University of Minnesota (Minneapolis) to obtain a Ph.D. in pathobiology before undergoing postdoctoral training in molecular immunology at the Mayo Clinic in Rochester, Minnesota.

Dan subsequently became an Assistant Professor in the Division of Oncology Research and Department of Immunology at the Mayo Clinic, where he has risen through the ranks to Full Professor. Dan is also a faculty member of the Department of Biochemistry and Molecular Biology and presently serves as the Associate Director for Basic Science in the NCI-funded Mayo Clinic Comprehensive Cancer Center. In addition, he is the Leader of the Growth, Senescence and Cancer platform in the newly formed Mayo Clinic Center for Biomedical Discovery.

Dan has had a long-standing interest in delineating the signaling pathways regulating natural-killer-cell cytotoxicity and T-cell activation with a specific emphasis toward mechanisms impacting the actin and microtubule cytoskeletons. More recently, his work has also included investigations into the mechanisms regulating receptor trafficking through the endosomal network via WASH and the retromer complex. Lastly, his lab continues to perform studies in cancer biology, where he focuses on signaling pathways regulating pancreatic cancer proliferation and survival, as well as those involved in generating and maintaining cancer-initiating cells.

David Stephens received a B.Sc. and Ph.D. in biochemistry from the University of London. He then moved to the University of Bristol for a postdoctoral position with Professor George Banting, followed, by further postdoctoral work in the cell biology program at EMBL in Heidelberg, Germany, with Dr Rainer Pepperkok. After leaving Germany, David returned to Bristol as a Medical Research Council fellow in the School of Biochemistry. He was subsequently appointed Professor of Cell Biology in 2010. David is also Academic Director of the Wolfson Bioimaging Facility in Bristol and is highly active in both research and teaching roles within the university. He is a member of the Faculty of 1000 and of both the British and American Societies for Cell Biology. David served on committees for both the British Society for Cell Biology and Royal Microscopical Society and, until recently, was an Editor for *Biology Open*, a sister journal to JCS.

David's lab has made extensive use of imaging techniques, notably live-cell imaging and electron microscopy, to elucidate molecular

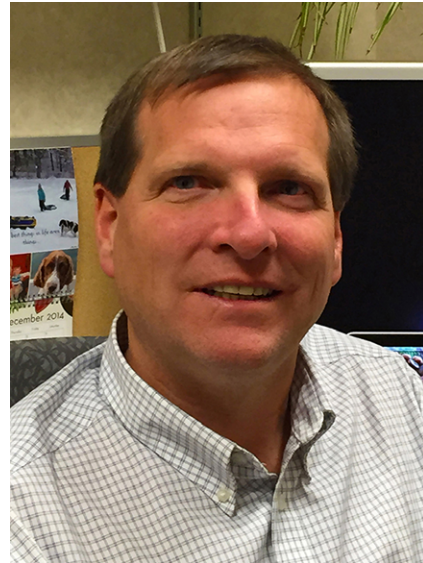

**Daniel Billadeau**

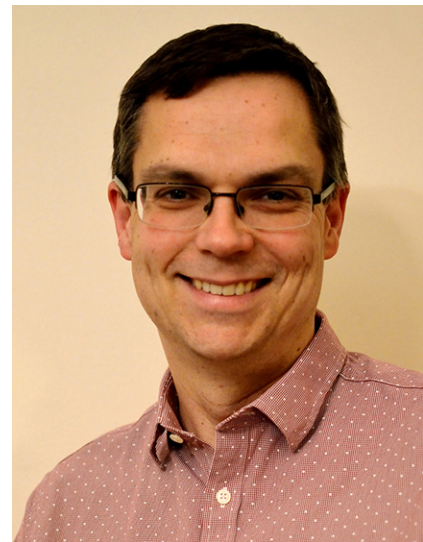

**David Stephens**

mechanisms underlying membrane traffic and cytoskeletal dynamics in mammalian cells. More recently, his work has included the use of zebrafish as a genetic model. The goal of his work is to understand the fundamental mechanisms that underlie cell function in both the normal healthy state and in disease; this has led to his most recent work studying the role of endomembranes and motor proteins in the formation and function of primary cilia.

We extend a warm welcome to both Dan and David, and we thank Francis for his hard work over the past decade.
